# Supplementary material for: Expanding the Use of Dynamic Electrostatic Repulsion Reversed-Phase Chromatography: An Effective Elution Mode for Peptides Control and Analysis
Source: MDPI journal article supplement (doi:10.3390/molecules26144348), 2021-07-19
Supplement: s1 [file s1]

# Supporting information

Giulia Mazzocanti <sup>1,\*</sup>, Simone Manetto <sup>1</sup>, Michele Bassan <sup>2</sup>, Marco Macis <sup>2</sup>, Antonia Iazzetti <sup>3</sup>, Walter Cabri <sup>4</sup>, Antonio Ricci <sup>2,\*</sup> and Francesco Gasparri <sup>1</sup>

<sup>1</sup>Department of Drug Chemistry and Technology, "Sapienza" University of Rome, 00185 Rome, Italy; simone.manetto@uniroma1.it (S.M.); francesco.gasparri@uniroma1.it (F.G.)

<sup>2</sup>Fresenius Kabi iPSUM, Piazza Maestri del Lavoro 7, 20063 Cernusco sul Naviglio, Italy; Michele.Bassan@fresenius-kabi.com (M.B.); marco.macis@fresenius-kabi.com (M.M.)

<sup>3</sup>Department of Basic Biotechnological Sciences, Intensivological and Perioperative Clinics, Catholic University of Sacred Heart, Rome, Italy; antonia.iazzetti@unicatt.it (A.I.);

<sup>4</sup>Department of Chemistry, Alma Mater Studiorum-University of Bologna, Via Selmi 2, 40126 Bologna, Italy; walter.cabri@unibo.it

**Figure S1.** Chromatograms refer to the separation of eight peptides (see Table 1 in main text). MP with 10 mM TBAHSO<sub>4</sub>. Columns used: A) ACQUITY UPLC® BEH C18 (150 mm × 2.1 mm L × I.D.) 1.7 μm 300 Å FPP and BEH particle B) Halo peptide ES-C18 (150 mm × 3.0 mm L × I.D.) 2.0 μm 160 Å SPP C) Halo peptide ES-C18 (150 mm × 4.6 mm L × I.D.) 2.7 μm 160 Å SPP.

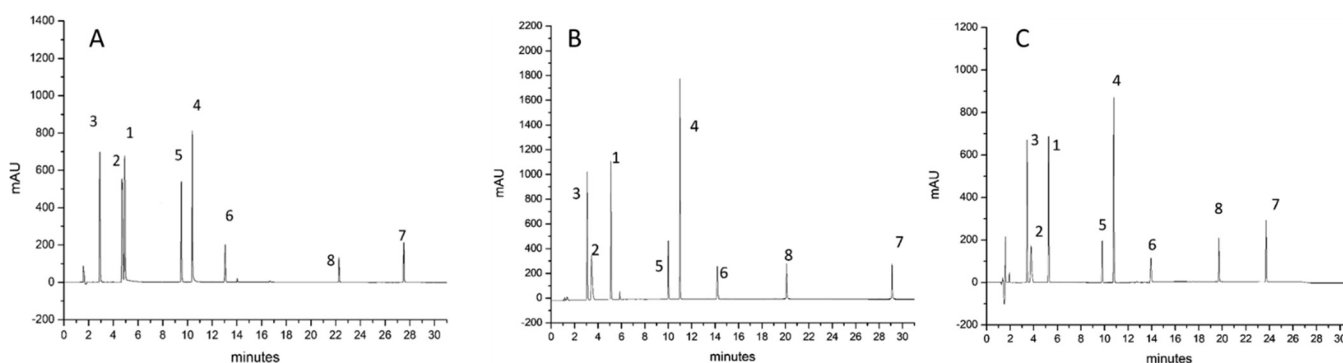

**Table S1.** Asymmetry values (As).

| Formic Acid |         |      |      |      | Trifluoroacetic acid |         |      |      |      | TBAHSO <sub>4</sub> |         |      |      |      |
|-------------|---------|------|------|------|----------------------|---------|------|------|------|---------------------|---------|------|------|------|
| entry       | columns |      |      |      | entry                | columns |      |      |      | entry               | columns |      |      |      |
|             | i       | ii   | iii  | iv   |                      | i       | ii   | iii  | iv   |                     | i       | ii   | iii  | iv   |
| 3           | 5.25    | 5.22 | 4.73 | 4.34 | 3                    | 1.12    | 2.61 | n.a. | n.a. | 3                   | 1.31    | 1.33 | 1.11 | 1.06 |
| 2           | 5.72    | 5.06 | 5.16 | 3.81 | 2                    | 2.58    | 2.70 | n.a. | n.a. | 2                   | 1.02    | 1.22 | 1.46 | 1.27 |
| 1           | 4.56    | 4.59 | 4.93 | 3.41 | 1                    | 2.17    | 2.38 | 2.26 | 1.47 | 1                   | 1.16    | 2.02 | 1.16 | 1.06 |
| 5           | 2.83    | 3.10 | 2.89 | 2.17 | 5                    | 1.33    | 1.49 | 1.31 | 1.09 | 5                   | 1.09    | 1.25 | 1.16 | 1.08 |
| 6           | 1.08    | n.a. | 4.63 | 4.36 | 4                    | 2.00    | 2.18 | 2.29 | 1.56 | 4                   | 1.18    | 1.14 | 1.14 | 1.05 |
| 4           | 2.90    | n.a. | 4.00 | 3.21 | 6                    | 1.41    | 1.68 | 2.67 | 1.14 | 6                   | 1.05    | 1.10 | 1.07 | 1.04 |
| 8           | 1.56    | 2.50 | 2.43 | 2.86 | 8                    | 1.37    | 1.30 | 2.00 | 1.23 | 8                   | 1.10    | 1.21 | 1.32 | 1.03 |
| 7           | 1.28    | 1.71 | 3.02 | 3.00 | 7                    | 1.30    | 1.28 | 2.01 | 1.15 | 7                   | 1.00    | 1.29 | 1.40 | 1.04 |

**Table S2.** Peak width at half height ( $W_{0.5}$ ).

| Formic Acid |         |      |      |      | Trifluoroacetic acid |         |      |      |      | TBASO <sub>4</sub> |         |      |      |      |
|-------------|---------|------|------|------|----------------------|---------|------|------|------|--------------------|---------|------|------|------|
| entry       | columns |      |      |      | entry                | columns |      |      |      | entry              | columns |      |      |      |
|             | i       | ii   | iii  | iv   |                      | i       | ii   | iii  | iv   |                    | i       | ii   | iii  | iv   |
| 3           | 0.55    | 0.43 | 0.28 | 0.25 | 3                    | 0.09    | 0.19 | 0.12 | 0.11 | 3                  | 0.12    | 0.14 | 0.06 | 0.05 |
| 2           | 0.46    | 0.40 | 0.28 | 0.25 | 2                    | 0.21    | 0.19 | 0.15 | 0.11 | 2                  | 0.07    | 0.08 | 0.01 | 0.11 |
| 1           | 0.42    | 0.35 | 0.25 | 0.22 | 1                    | 0.14    | 0.16 | 0.13 | 0.11 | 1                  | 0.01    | 0.07 | 0.05 | 0.05 |
| 5           | 0.34    | 0.20 | 0.14 | 0.13 | 5                    | 0.08    | 0.09 | 0.09 | 0.09 | 5                  | 0.06    | 0.07 | 0.05 | 0.06 |
| 6           | 0.39    | 0.19 | 0.21 | 0.18 | 4                    | 0.14    | 0.15 | 0.13 | 0.11 | 4                  | 0.05    | 0.05 | 0.05 | 0.05 |
| 4           | 0.34    | 0.33 | 0.25 | 0.23 | 6                    | 0.09    | 0.09 | 0.09 | 0.09 | 6                  | 0.08    | 0.09 | 0.08 | 0.10 |
| 8           | 0.19    | 0.12 | 0.24 | 0.20 | 8                    | 0.10    | 0.09 | 0.18 | 0.14 | 8                  | 0.11    | 0.05 | 0.16 | 0.10 |
| 7           | 0.17    | 0.21 | 0.10 | 0.28 | 7                    | 0.08    | 0.05 | 0.06 | 0.08 | 7                  | 0.04    | 0.06 | 0.05 | 0.10 |

**Table S3.** Average peak width ( $W_{avg}$ ) and Peak capacity ( $n_c$ ) values.

| Formic Acid   |      |      |      |      | Trifluoroacetic acid |      |      |      | TBAHSO <sub>4</sub> |      |      |      |
|---------------|------|------|------|------|----------------------|------|------|------|---------------------|------|------|------|
|               | i    | ii   | iii  | iv   | i                    | ii   | iii  | iv   | i                   | ii   | iii  | iv   |
| Peak capacity | 46   | 55   | 70   | 70   | 130                  | 120  | 127  | 144  | 223                 | 204  | 236  | 201  |
| $W_{avg}$     | 0.67 | 0.56 | 0.44 | 0.44 | 0.23                 | 0.25 | 0.24 | 0.21 | 0.14                | 0.15 | 0.13 | 0.15 |
| STD           | 0.29 | 0.23 | 0.13 | 0.09 | 0.09                 | 0.11 | 0.08 | 0.04 | 0.07                | 0.07 | 0.09 | 0.05 |

**Table S4.** Resolution values ( $R_s$ ).

| Formic Acid |         |      |      |      | Trifluoroacetic acid |         |      |      |      | TBASO <sub>4</sub> |         |      |      |      |
|-------------|---------|------|------|------|----------------------|---------|------|------|------|--------------------|---------|------|------|------|
| entry       | columns |      |      |      | entry                | columns |      |      |      | entry              | columns |      |      |      |
|             | i       | ii   | iii  | iv   |                      | i       | ii   | iii  | iv   |                    | i       | ii   | iii  | iv   |
| 3           |         |      |      |      | 3                    |         |      |      |      | 3                  |         |      |      |      |
| 2           | 2.26    | 4.74 | 4.62 | 5.65 | 2                    | 14.9    | 2.14 | 1.01 | 1.01 | 2                  | 8.43    | 4.77 | 2.61 | 2.44 |
| 1           | 1.60    | 2.46 | 4.55 | 4.05 | 1                    | 5.04    | 4.56 | 8.05 | 9.55 | 1                  | 22.3    | 16.2 | 11.8 | 10.9 |
| 5           | 6.16    | 5.22 | 3.83 | 3.62 | 5                    | 4.82    | 6.41 | 4.17 | 1.87 | 5                  | 14.0    | 47.1 | 57.6 | 49.3 |
| 6           | 8.15    | 6.96 | 15.4 | 11.3 | 4                    | 22.3    | 14.1 | 27.1 | 31.8 | 4                  | 10.6    | 4.40 | 12.7 | 10.3 |
| 4           | 1.26    | 1.07 | 2.86 | 3.64 | 6                    | 1.74    | 3.88 | 2.65 | 3.36 | 6                  | 26.9    | 32.2 | 28.7 | 24.9 |
| 8           | 7.45    | 7.87 | 3.71 | 1.92 | 8                    | 19.1    | 12.4 | 18.1 | 19.2 | 8                  | 81.3    | 28.8 | 35.7 | 22.2 |
| 7           | 23.2    | 24.5 | 30.1 | 13.8 | 7                    | 24.5    | 47.8 | 16.7 | 31.7 | 7                  | 48.5    | 45.3 | 49.9 | 30.0 |
